# Supplementary material
Source: HighWire-hosted journal article supplement (https://sit.bmj.com/content/4/1/e000081)
Supplement: inline-supplementary-material-2 [file inline-supplementary-material-2.pdf]

## Appendix 2 Search Strategies

- **1 Search strategy for the fourth update and expansion of the existing review 2014**
- There were three separate and independent searches conducted. The first search was carried out by the Cochrane Review Group - Wounds through the trials search coordinator. The second search was conducted as an institutional search by the authors independent of Cochrane Review Group - Wounds. The reason for this was that this systematic review was not strictly an update of an existing review but a significant expansion on the outcomes of interest to include additional public health related and clinical outcomes beyond the outcomes covered in the earlier reviews. This entailed expanding on the existing search provided through the trials search coordinator at CRG-wounds. It included new search terms with expanded dates and not restricted to the dates used by CRG-wounds. The search involved the same databases previously searched with the addition of the Web of Science database that is included. The third search was conducted by CRG-wounds to include any recent literature that might have been published since the last search provided by CRG-wounds through April 2015. All search strategies are described in detail below.

- **2 Ovid MEDLINE<sup>1</sup>, PubMed search strategy**
- The trials search coordinator with the Cochrane Review Group - Wound searched the database Ovid Medline utilizing the following search strategy and dates:
- Database: Ovid MEDLINE(R) without Revisions <1996 to March Week 4 2013>  
Search Strategy:

-----

1 exp Debridement/ (7831)  
 2 (debrid\$ or slough\$ or deslough\$).ti,ab. (12051)  
 3 exp Larva/ (24406)  
 4 (larva\$ or maggot\$ or biosurgery or bio-surgery).ti,ab. (38005)  
 5 (wound\$ adj (irrigat\$ or cleanse\$)).ti,ab. (161)  
 6 whirlpool.ti,ab. (149)  
 7 (collagenase\$ or fibrinolytic\$ or proteolytic\$ or trypsin or streptokinase or streptodornase or varidase).ti,ab. (58063)  
 8 exp Papain/ (1033)  
 9 papain.ti,ab. (2276)  
 10 (hypochlorite or hydrogen peroxide).ti,ab. (25102)  
 11 (malic acid or benzoid acid or salicylic acid or propylene glycol).ti,ab. (6877)  
 12 dakin solution.ti,ab. (1)  
 13 (dextranomer\$ or cadexomer or xerogel or eusol or debrisan).ti,ab. (451)  
 14 (polysaccharide adj (bead\$ or paste\$)).ti,ab. (7)  
 15 (iodoflex or iodisorb).ti,ab. (8)  
 16 (((gauze or adherent or absorbent or tulle or polysaccharide or alginate or foam or hydrofibre or hydrofiber) adj dressing\$) or saline gauze or hydrocolloid\$ or granuflex or tegasorb or aquacel or hydrocoll or combiderm or duoderm).ti,ab. (1122)  
 17 "wet-to-dry dressings".ti,ab. (18)  
 18 exp Honey/ (1503)  
 19 honey\$.ti,ab. (7264)

20 exp Hydrogel/ (2336)  
 21 (hydrogel\$ or intrasite gel or intrasitgel or sterigel or granugel or nugel or purilon or vigilon).ti,ab. (9889)  
 22 exp Zinc Oxide/ (2378)  
 23 zinc oxide.ti,ab. (1273)  
 24 or/1-23 (170471)  
 25 exp Foot Ulcer/ (5689)  
 26 exp Diabetic Foot/ (4929)  
 27 (diabet\$ adj3 ulcer\$).ti,ab. (1975)  
 28 (diabet\$ adj3 (foot or feet)).ti,ab. (3663)  
 29 (diabet\$ adj3 wound\$).ti,ab. (1091)  
 30 or/25-29 (7198)  
 31 24 and 30 (800)  
 32 randomized controlled trial.pt. (245491)  
 33 controlled clinical trial.pt. (39951)  
 34 randomized.ab. (200013)  
 35 placebo.ab. (93002)  
 36 clinical trials as topic.sh. (80489)  
 37 randomly.ab. (137654)  
 38 trial.ti. (74410)  
 39 or/32-38 (554321)  
 40 (animals not (humans and animals)).sh. (1639102)  
 41 39 not 40 (504319)  
 42 31 and 41 (111)  
 43 (2009\* or 2010\* or 2011\* or 2012\* or 2013\*).ed. (3070501)  
 44 42 and 43 (50)

- 
- The authors conducted a search in conjunction with our library search coordinator at the University of Connecticut. The database Medline was searched utilizing the following search strategy and search dates:
- 
- **PubMed**
- Dates Searched: 1940's to present
- Results: 811
- (diabetes OR diabetic\* OR "Diabetes Mellitus"[Mesh]) AND (wound\* OR ulcer\* OR callus\* OR "Diabetic Foot"[Mesh] OR "diabetic foot" OR "diabetic feet") AND ("Toes"[Mesh] OR toe OR toes OR phalange\* OR "Lower Extremity"[Mesh] OR "Leg"[Mesh] OR leg OR legs OR extremity OR "Foot"[Mesh] OR foot OR feet) AND ("Debridement"[Mesh] OR debrid\* OR slough\* OR deslough\* OR larva\* OR maggot\* OR MDT OR biosurgery OR "bio-surgery" OR surgery OR surgical OR scalpel\* OR hydrogel\* OR "moist wound healing" OR enzyme\* OR mechanical OR autolytic OR ultrasound OR laser OR lasers OR sharp OR irrigate\* OR irrigation OR cleanse\* OR whirlpool\* OR collagenase\* OR fibrinolytic\* OR proteolytic\* OR trypsin OR streptokinase OR streptodornase OR varidase OR papain OR hypochlorite OR "hydrogen peroxide" OR acid OR acids OR "propylene glycol" OR "dakín solution" OR dextranomer\* OR cadexomer\* OR xerogel\* OR eusol\* OR debrisan\* OR paste\* OR

iodoflex OR iodisorb OR gauze\* OR tulle OR polysaccharide\* OR bead OR alginate\*OR foam\* OR hydrofibre\* OR hydrofiber\* OR dressing\* OR saline OR honey\* OR gel OR gels OR hydrocolloid\* OR granuflex OR tegasorb OR aquacel OR hydrocoll\* OR combiderm OR duoderm OR sterigel\* OR granugel\* OR nugel OR purilon OR vigilon OR "zinc oxide" OR phenytoin) AND (("clinical"[tiab] AND "trial"[tiab]) OR "clinical trials as topic"[mesh] OR "clinical trial"[pt] OR random\*[tiab] OR "random allocation"[mesh] OR "therapeutic use"[sh]) AND "humans"[mesh] NOT ("Cross-Sectional Studies"[MeSH Terms] OR "Case Reports"[pt] OR Comment[pt] OR Editorial[pt] OR Letter[pt] OR Review[pt] OR "case control"[ti] OR "case report"[ti] OR "case study"[ti] OR "case series"[ti] OR "Case-Control Studies"[Mesh] OR "Follow-Up Studies"[Mesh] OR "observational study"[ti] OR "prospective cohort"[ti] OR "cohort studies" [Mesh:NoExp] OR "cohort study"[ti] OR "Longitudinal Studies" [Mesh:NoExp] OR "Follow-Up Studies"[mesh] OR "Retrospective Studies"[mesh] OR "non-randomized"[ti] OR "follow up study"[ti] OR rat[ti] OR rats[ti] OR mice[ti] OR mouse[ti] OR dog[ti] OR dogs[ti] OR cats[ti])

- 
- **PubMed Supplemental Search 1: systematic reviews & meta-analysis**
- Dates Searched: 1940's to present
- Results: 237
- (diabetes OR diabetic\* OR "Diabetes Mellitus"[Mesh]) AND (wound\* OR ulcer\* OR callus\* OR "Diabetic Foot"[Mesh] OR "diabetic foot" OR "diabetic feet") AND ("Toes"[Mesh] OR toe OR toes OR phalange\* OR "Lower Extremity"[Mesh] OR "Leg"[Mesh] OR leg OR legs OR extremity OR "Foot"[Mesh] OR foot OR feet) AND ("Debridement"[Mesh] OR debrid\* OR slough\* OR deslough\* OR larva\* OR maggot\* OR MDT OR biosurgery OR bio-surgery OR surgery OR surgical OR scalpel\* OR hydrogel\* OR "moist wound healing" OR enzyme\* OR mechanical OR autolytic OR ultrasound OR laser OR lasers OR sharp OR irrigate\* OR irrigation OR cleanse\* OR whirlpool\* OR collagenase\* OR fibrinolytic\* OR proteolytic\* OR trypsin OR streptokinase OR streptodornase OR varidase OR papain OR hypochlorite OR "hydrogen peroxide" OR acid OR acids OR "propylene glycol" OR "dakin solution" OR dextranomer\* OR cadexomer\* OR xerogel\* OR eusol\* OR debrisan\* OR paste\* OR iodoflex OR iodisorb OR gauze\* OR tulle OR polysaccharide\* OR bead OR alginate\*OR foam\* OR hydrofibre\* OR hydrofiber\* OR dressing\* OR saline OR honey\* OR gel OR gels OR hydrocolloid\* OR granuflex OR tegasorb OR aquacel OR hydrocoll\* OR combiderm OR duoderm OR sterigel\* OR granugel\* OR nugel OR purilon OR vigilon OR "zinc oxide" OR phenytoin) AND systematic [sb] NOT (rat[ti] OR rats[ti] OR mice[ti] OR mouse[ti] OR dog[ti] OR dogs[ti] OR cats[ti])

- 
- 
- 
- 
- 
-

- **PubMed Supplemental Search 2: pre-indexed citations**
- Dates Searched: 2014 to present
- Results: 89
- (diabetes OR diabetic\* OR "Diabetes Mellitus"[Mesh]) AND (wound\* OR ulcer\* OR callus\* OR "Diabetic Foot"[Mesh] OR "diabetic foot" OR "diabetic feet") AND ("Toes"[Mesh] OR toe OR toes OR phalange\* OR "Lower Extremity"[Mesh] OR "Leg"[Mesh] OR leg OR legs OR extremity OR "Foot"[Mesh] OR foot OR feet) AND ("Debridement"[Mesh] OR debrid\* OR slough\* OR deslough\* OR larva\* OR maggot\* OR MDT OR biosurgery OR bio-surgery OR surgery OR surgical OR scalpel\* OR hydrogel\* OR "moist wound healing" OR enzyme\* OR mechanical OR autolytic OR ultrasound OR laser OR lasers OR sharp OR irrigate\* OR irrigation OR cleanse\* OR whirlpool\* OR collagenase\* OR fibrinolytic\* OR proteolytic\* OR trypsin OR streptokinase OR streptodornase OR varidase OR papain OR hypochlorite OR "hydrogen peroxide" OR acid OR acids OR "propylene glycol" OR "daklin solution" OR dextransomer\* OR cadexomer\* OR xerogel\* OR eusol\* OR debrisan\* OR paste\* OR iodoflex OR iodisorb OR gauze\* OR tulle OR polysaccharide\* OR bead OR alginate\* OR foam\* OR hydrofibre\* OR hydrofiber\* OR dressing\* OR saline OR honey\* OR gel OR gels OR hydrocolloid\* OR granuflex OR tegasorb OR aquacel OR hydrocoll\* OR combiderm OR duoderm OR sterigel\* OR granugel\* OR nugel OR purilon OR vigilon OR "zinc oxide" OR phenytoin) NOT ("Cross-Sectional Studies"[MeSH Terms] OR "Case Reports"[pt] OR Comment[pt] OR Editorial[pt] OR Letter[pt] OR Review[pt] OR "case control"[ti] OR "case report"[ti] OR "case study"[ti] OR "case series"[ti] OR "Case-Control Studies"[Mesh] OR "Follow-Up Studies"[Mesh] OR "observational study"[ti] OR "prospective cohort"[ti] OR "cohort studies"[Mesh:NoExp] OR "cohort study"[ti] OR "Longitudinal Studies"[Mesh:NoExp] OR "Follow-Up Studies"[mesh] OR "Retrospective Studies"[mesh] OR "non-randomized"[ti] OR "follow up study"[ti] OR rat[ti] OR rats[ti] OR mice[ti] OR mouse[ti] OR dog[ti] OR dogs[ti] OR cats[ti])
- **3 Ovid EMBASE, Embase via Scopus search strategy**
- The trials search coordinator with the Cochrane Review Group - Wound searched the database Embase utilizing the following search strategy and dates:
- Database: Embase <1996 to 2013 Week 13>  
Search Strategy:  
-----  
1 exp Decubitus/ (9327)  
2 (pressure adj (ulcer\$ or sore\$)).ti,ab. (5772)  
3 (decubitus adj (ulcer\$ or sore\$)).ti,ab. (801)  
4 (bedsore\$ or (bed adj sore\$)).ti,ab. (417)  
5 or/1-4 (10522)  
6 exp Nutrition/ (910056)  
7 nutrition\$.ti,ab. (142489)  
8 diet\$.ti,ab. (282256)  
9 (tube adj (fed or feed or feeding)).ti,ab. (2344)

- 10 or/6-9 (1017934)
- 11 5 and 10 (1232)
- 12 exp Clinical trial/ (798274)
- 13 Randomized controlled trial/ (288746)
- 14 Randomization/ (50983)
- 15 Single blind procedure/ (15731)
- 16 Double blind procedure/ (86635)
- 17 Crossover procedure/ (32192)
- 18 Placebo/ (167856)
- 19 Randomized controlled trial\$.tw. (81720)
- 20 RCT.tw. (10802)
- 21 Random allocation.tw. (919)
- 22 Randomly allocated.tw. (14440)
- 23 Allocated randomly.tw. (1221)
- 24 (allocated adj2 random).tw. (265)
- 25 Single blind\$.tw. (9774)
- 26 Double blind\$.tw. (91413)
- 27 ((treble or triple) adj blind\$.tw. (244)
- 28 Placebo\$.tw. (139064)
- 29 Prospective study/ (203909)
- 30 or/12-29 (1099022)
- 31 Case study/ (16391)
- 32 Case report.tw. (169255)
- 33 Abstract report/ or letter/ (515715)
- 34 or/31-33 (697032)
- 35 30 not 34 (1070653)
- 36 animal/ (727929)
- 37 human/ (8737685)
- 38 36 not 37 (486914)
- 39 35 not 38 (1048222)
- 40 11 and 39 (227)
- 41 (2011\* or 2012\* or 2013\*).em. (2630697)
- 42 40 and 41 (47)

- The authors conducted an independent search in conjunction with our library search coordinator at the University of Connecticut. The database EMBASE via Scopus was searched utilizing the following search strategy and search dates:

- 
- 
- 
- 
- 
- 
- 
- 
- 
-

- **EMBASE via Scopus**
- Dates Searched: 1960 to present
- Limiters: Exclude Publication Types: Review, Editorial, Letter
- Results: 893
- 1 diabet\*
- 2 (wound\* OR ulcer\* OR callus\* OR “diabetic foot” OR “diabetic feet”)
- 3 (toe OR toes OR phalange\* OR "lower extremity" OR leg OR legs OR extremity OR foot OR feet)
- 4 (debrid\* OR slough\* OR deslough\* OR larva\* OR maggot\* OR MDT OR biosurgery OR bio-surgery OR surgery OR surgical OR scalpel\* OR hydrogel\* OR "moist wound healing" OR enzyme\* OR mechanical OR autolytic OR ultrasound OR laser OR lasers OR sharp OR irrigate\* OR irrigation OR cleanse\* OR whirlpool\* OR collagenase\* OR fibrinolytic\* OR proteolytic\* OR trypsin OR streptokinase OR streptodornase OR varidase OR papain OR hypochlorite OR “hydrogen peroxide” OR acid OR acids OR “propylene glycol” OR “dakin solution” OR dextranomer\* OR cadexomer\* OR xerogel\* OR eusol\* OR debrisan\* OR paste\* OR iodoflex OR iodisorb OR gauze\* OR tulle OR polysaccharide\* OR bead OR alginate\* OR foam\* OR hydrofibre\* OR hydrofiber\* OR dressing\* OR saline OR honey\* OR gel OR gels OR hydrocolloid\* OR granuflex OR tegasorb OR aquacel OR hydrocoll\* OR combiderm OR duoderm OR sterigel\* OR granugel\* OR nugel OR purilon OR vigilon OR “zinc oxide” OR phenytoin)
- 5 (in article title) clinical OR trial
- 6 (in abstract) clinical OR trial
- 7 (in article title) random\*
- 8 (in abstract) random\*
- 9 “clinical trial”
- 10 #5 AND #6
- 11 #10 OR #7 OR #8 OR #9
- 12 #1 AND #2 AND #3 AND #4 AND #11
- 13 (in article title) rat OR rats OR mice OR mouse OR dog OR dogs OR cats OR "cross-sectional study" OR “case report” OR comment OR editorial OR letter OR "case control" OR "case study" OR “case series” OR "follow-up study" OR “observational study” OR “prospective cohort” OR “cohort study” OR “longitudinal study” OR “retrospective study” OR “non-randomized” OR review
- 14 #12 AND NOT #13
- 
- 
- 
- 
- 
- 
- 
- 
- 
- 
- 
- 
- 
- 
- 
- 
- 
- 
- 
- 
-

- **EMBASE<sup>2</sup> Supplemental Search: systematic reviews & meta-analysis**
- Dates Searched: 1960 to present
- Limiters: Exclude Publication Types: Editorial, Letter
- Results: 189
- 1 diabet\*
- 2 (wound\* OR ulcer\* OR callus\* OR “diabetic foot” OR “diabetic feet”)
- 3 (toe OR toes OR phalange\* OR "lower extremity" OR leg OR legs OR extremity OR foot OR feet)
- 4 (debrid\* OR slough\* OR deslough\* OR larva\* OR maggot\* OR MDT OR biosurgery OR bio-surgery OR surgery OR surgical OR scalpel\* OR hydrogel\* OR "moist wound healing" OR enzyme\* OR mechanical OR autolytic OR ultrasound OR laser OR lasers OR sharp OR irrigate\* OR irrigation OR cleanse\* OR whirlpool\* OR collagenase\* OR fibrinolytic\* OR proteolytic\* OR trypsin OR streptokinase OR streptodornase OR varidase OR papain OR hypochlorite OR “hydrogen peroxide” OR acid OR acids OR “propylene glycol” OR “dakin solution” OR dextranomer\* OR cadexomer\* OR xerogel\* OR eusol\* OR debrisan\* OR paste\* OR iodoflex OR iodisorb OR gauze\* OR tulle OR polysaccharide\* OR bead OR alginate\* OR foam\* OR hydrofibre\* OR hydrofiber\* OR dressing\* OR saline OR honey\* OR gel OR gels OR hydrocolloid\* OR granuflex OR tegasorb OR aquacel OR hydrocoll\* OR combiderm OR duoderm OR sterigel\* OR granugel\* OR nugel OR purilon OR vigilon OR “zinc oxide” OR phenytoin)
- 5 “systematic review” OR “systematic literature review” OR “meta-analysis” OR “meta-synthesis”
- 6 #1 AND #2 AND #3 AND #4 AND #5
- 7 (in article title) rat OR rats OR mice OR mouse OR dog OR dogs OR cats
- 8 #6 AND NOT #7
- 
- **4 EBSCO CINAHL<sup>3</sup> search strategy**
- The trials search coordinator with the Cochrane Review Group - Wound searched the database EBSCO CINAHL utilizing the following search strategy and dates:
- S30S23 and S29  
S29S24 or S25 or S26 or S27 or S28  
S28TI diabet\* N3 wound\* or AB diabet\* N3 wound\*  
S27TI (diabet\* N3 foot or diabet\* N3 feet) or AB (diabet\* N3 foot or diabet\* N3 feet)  
S26TI diabet\* N3 ulcer\* or AB diabet\* N3 ulcer\*  
S25(MH "Foot Ulcer+")  
S24(MH "Diabetic Foot")  
S23S1 or S2 or S3 or S4 or S5 or S6 or S7 or S8 or S9 or S10 or S11 or S12 or S13 or S14 or S15 or S16 or S17 or S18 or S19 or S20 or S21 or S22  
S22TI zinc oxide or AB zinc oxide  
S21(MH "Zinc Oxide")  
S20TI (hydrogel\* or intrasite gel or intrasitgel or sterigel or granugel or nugel or purilon or vigilon) or AB (hydrogel\* or intrasite gel or intrasitgel or sterigel or granugel or nugel or purilon or vigilon)  
S19(MH "Hydrogel Dressings")  
S18TI honey or AB honey  
S17(MH "Honey")

S16TI wet-to-dry dressings or AB wet-to-dry dressings

S15TI (dressing\* or gauze or adherent or absorbent or tulle or polysaccharide or alginate or foam or hydrofibre or hydrofiber or hydrocolloid\* or granuflex or tegasorb or aquacel or hydrocoll\* or combiderm or duoderm) or AB (dressing\* or gauze or adherent or absorbent or tulle or polysaccharide or alginate or foam or hydrofibre or hydrofiber or hydrocolloid\* or granuflex or tegasorb or aquacel or hydrocoll\* or combiderm or duoderm)

S14TI ( iodoflex or iodisorb ) or AB ( iodoflex or iodisorb )

S13TI (polysaccharide bead\* or polysaccharide paste) or AB (polysaccharide bead\* or polysaccharide paste)

S12TI (dextranomer\* or cadexomer or xerogel or eusol or debrisan) or AB (dextranomer\* or cadexomer or xerogel or eusol or debrisan)

S11TI dakin solution or AB dakin solution

S10TI (malic acid or benzoic acid or salicylic acid or propylene glycol) or AB (malic acid or benzoic acid or salicylic acid or propylene glycol)

S9TI (hypochlorite or hydrogen peroxide) or AB (hypochlorite or hydrogen peroxide)

S8TI whirlpool or AB whirlpool

S7TI (wound irrigat\* or wound cleans\*) or AB (wound irrigat\* or wound cleans\*)

S6TI papain or AB papain

S5TI (collagenase\* or fibrinolytic\* or proteolytic\* or trypsin or streptokinase or streptodornase or varidase) or AB (collagenase\* or fibrinolytic\* or proteolytic\* or trypsin or streptokinase or streptodornase or varidase)

S4TI (larva\* or maggot\* or biosurgery or bio-surgery) or AB (larva\* or maggot\* or biosurgery or bio-surgery)

S3(MH "Larval Therapy")

S2TI (debrid\* or slough\* or deslough\*) or AB (debrid\* or slough\* or deslough\*)

S1(MH "Debridement")

- The authors conducted an independent search in conjunction with our library search coordinator at the University of Connecticut. The database EBSCO CINAHL was searched utilizing the following search strategy and search dates:

- 
- 
- 
- 
- 
- 
- 
- 
- 
- 
- 
- 
- 
- 
- 
- 
-



- **CINAHL<sup>3</sup>**
- Dates Searched: 1981 to present
- Limiters: Exclude MEDLINE records; Human
- Results: 57
- S1 (MH "Diabetes Mellitus+")
- S2 diabet\*
- S3 (MH "Diabetic Foot")
- S4 wound\* OR ulcer\* OR callus\* OR "diabetic feet" OR "diabetic foot"
- S5 (MH "Toes")
- S6 (MH "Lower Extremity+")
- S7 (MH "Leg")
- S8 (MH "Foot+")
- S9 toe OR toes OR phalange\* OR leg OR legs OR extremity OR foot OR feet
- S10 (MH "Debridement+")
- S11 debrid\* or slough\* OR deslough\* OR larva\* OR maggot\* OR MDT OR biosurgery OR bio-surgery OR surgery OR surgical OR scalpel\* OR hydrogel\* OR "moist wound healing" OR enzyme\* OR mechanical OR autolytic OR ultrasound OR laser OR lasers OR sharp OR irrigate\* OR irrigation OR cleanse\* OR whirlpool\* OR collagenase\* OR fibrinolytic\* OR proteolytic\* OR trypsin OR streptokinase OR streptodornase OR varidase OR papain OR hypochlorite OR "hydrogen peroxide" OR acid OR acids OR "propylene glycol" OR "daklin solution" OR dextranomer\* OR cadexomer\* OR xerogel\* OR eusol\* OR debrisan\* OR paste\* OR iodoflex OR iodisorb OR gauze\* OR tulle OR polysaccharide\* OR bead OR alginate\* OR foam\* OR hydrofibre\* OR hydrofiber\* OR dressing\* OR saline OR honey\* OR gel OR gels OR hydrocolloid\* OR granuflex OR tegasorb OR aquacel OR hydrocoll\* OR combiderm OR duoderm OR sterigel\* OR granugel\* OR nugel OR purilon OR vigilon OR "zinc oxide" OR phenytoin
- S12 TI (clinical OR trial) AND AB (clinical OR trial)
- S13 (MH "Clinical Trials+")
- S14 TI random\* OR AB random\*
- S15 S1 OR S2
- S16 S3 OR S4
- S17 S5 OR S6 OR S7 OR S8 OR S9
- S18 S10 OR S11
- S19 S12 OR S13 OR S14
- S20 S15 AND S16 AND S17 AND S18 AND S19
- S21 (in title) rat OR rats OR mice OR mouse OR dog OR dogs OR cats OR "cross-sectional study" OR "case report" OR comment OR editorial OR letter OR "case control" OR "case study" OR "case series" OR "follow-up study" OR "observational study" OR "prospective cohort" OR "cohort study" OR "longitudinal study" OR "retrospective study" OR "non-randomized" OR review
- S22 S20 NOT S21
- 
- 
- 
- 
-

- **CINAHL<sup>3</sup> Supplemental Search: systematic reviews & meta-analysis**
- Dates Searched: 1981 to present
- Limiters: Exclude MEDLINE records; Human; Publication Type: Meta Analysis, Meta Synthesis, Systematic Review
- Results: 18
- S1 (MH "Diabetes Mellitus+")
- S2 diabet\*
- S3 (MH "Diabetic Foot")
- S4 wound\* OR ulcer\* OR callus\* OR "diabetic feet" OR "diabetic foot"
- S5 (MH "Toes")
- S6 (MH "Lower Extremity+")
- S7 (MH "Leg")
- S8 (MH "Foot+")
- S9 toe OR toes OR phalange\* OR leg OR legs OR extremity OR foot OR feet
- S10 (MH "Debridement+")
- S11 debrid\* or slough\* OR deslough\* OR larva\* OR maggot\* OR MDT OR biosurgery OR bio-surgery OR surgery OR surgical OR scalpel\* OR hydrogel\* OR "moist wound healing" OR enzyme\* OR mechanical OR autolytic OR ultrasound OR laser OR lasers OR sharp OR irrigate\* OR irrigation OR cleanse\* OR whirlpool\* OR collagenase\* OR fibrinolytic\* OR proteolytic\* OR trypsin OR streptokinase OR streptodornase OR varidase OR papain OR hypochlorite OR "hydrogen peroxide" OR acid OR acids OR "propylene glycol" OR "daklin solution" OR dextranomer\* OR cadexomer\* OR xerogel\* OR eusol\* OR debrisan\* OR paste\* OR iodoflex OR iodisorb OR gauze\* OR tulle OR polysaccharide\* OR bead OR alginate\* OR foam\* OR hydrofibre\* OR hydrofiber\* OR dressing\* OR saline OR honey\* OR gel OR gels OR hydrocolloid\* OR granuflex OR tegasorb OR aquacel OR hydrocoll\* OR combiderm OR duoderm OR sterigel\* OR granugel\* OR nugel OR purilon OR vigilon OR "zinc oxide" OR phenytoin
- S12 S1 OR S2
- S13 S3 OR S4
- S14 S5 OR S6 OR S7 OR S8 OR S9
- S15 S10 OR S11
- S16 S12 AND S13 AND S14 AND S15
- 
- 
- 
- 
- 
- 
- 
- 
- 
-

- **5 Web of Science search strategy**
- The authors conducted an independent search in conjunction with our library search coordinator at the University of Connecticut. The database Web of Science was searched utilizing the following search strategy and search dates:
- **Web of Science<sup>4</sup>**
- Dates Searched: 1974 to present
- Results: 522
- 1 diabet\*
- 2 (wound\* OR ulcer\* OR callus\* OR “diabetic foot” OR “diabetic feet”)
- 3 (toe OR toes OR phalange\* OR "lower extremity" OR leg OR legs OR extremity OR foot OR feet)
- 4 (debrid\* OR slough\* OR deslough\* OR larva\* OR maggot\* OR MDT OR biosurgery OR bio-surgery OR surgery OR surgical OR scalpel\* OR hydrogel\* OR "moist wound healing" OR enzyme\* OR mechanical OR autolytic OR ultrasound OR laser OR lasers OR sharp OR irrigate\* OR irrigation OR cleanse\* OR whirlpool\* OR collagenase\* OR fibrinolytic\* OR proteolytic\* OR trypsin OR streptokinase OR streptodornase OR varidase OR papain OR hypochlorite OR “hydrogen peroxide” OR acid OR acids OR “propylene glycol” OR “dakin solution” OR dextranomer\* OR cadexomer\* OR xerogel\* OR eusol\* OR debrisan\* OR paste\* OR iodoflex OR iodisorb OR gauze\* OR tulle OR polysaccharide\* OR bead OR alginate\*OR foam\* OR hydrofibre\* OR hydrofiber\* OR dressing\* OR saline OR honey\* OR gel OR gels OR hydrocolloid\* OR granuflex OR tegasorb OR aquacel OR hydrocoll\* OR combiderm OR duoderm OR sterigel\* OR granugel\* OR nugel OR purilon OR vigilon OR “zinc oxide” OR phenytoin)
- 5 clinical AND trial
- 6 random\*
- 8 #5 OR #6
- 11 #1 AND #2 AND #3 AND #4 AND #8
- 12 Title=(rat OR rats OR mice OR mouse OR dog OR dogs OR cats OR "cross-sectional study" OR “case report” OR comment OR editorial OR letter OR "case control" OR "case study" OR “case series” OR "follow-up study” OR “observational study” OR “prospective cohort” OR “cohort study” OR “longitudinal study” OR “retrospective study” OR “non-randomized” OR review)
- 13 #11 NOT #12
- 
- **Web of Science Supplemental Search: systematic reviews & meta-analysis**
- Dates Searched: 1974 to present
- Results: 70
- 1 diabet\*
- 2 (wound\* OR ulcer\* OR callus\* OR “diabetic foot” OR “diabetic feet”)
- 3 (toe OR toes OR phalange\* OR "lower extremity" OR leg OR legs OR extremity OR foot OR feet)
- 4 (debrid\* OR slough\* OR deslough\* OR larva\* OR maggot\* OR MDT OR biosurgery OR bio-surgery OR surgery OR surgical OR scalpel\* OR hydrogel\* OR "moist wound healing" OR enzyme\* OR mechanical OR autolytic OR ultrasound OR laser OR lasers OR sharp OR irrigate\* OR irrigation OR cleanse\* OR whirlpool\* OR collagenase\* OR fibrinolytic\* OR proteolytic\* OR trypsin OR streptokinase OR streptodornase OR

varidase OR papain OR hypochlorite OR “hydrogen peroxide” OR acid OR acids OR “propylene glycol” OR “dakin solution” OR dextranomer\* OR cadexomer\* OR xerogel\* OR eusol\* OR debrisan\* OR paste\* OR iodoflex OR iodisorb OR gauze\* OR tulle OR polysaccharide\* OR bead OR alginate\* OR foam\* OR hydrofibre\* OR hydrofiber\* OR dressing\* OR saline OR honey\* OR gel OR gels OR hydrocolloid\* OR granuflex OR tegasorb OR aquacel OR hydrocoll\* OR combiderm OR duoderm OR sterigel\* OR granugel\* OR nugel OR purilon OR vigilon OR “zinc oxide” OR phenytoin)

- 5 ("systematic review" OR "systematic literature review" OR "meta-analysis" OR "meta-synthesis")
- 6 #1 AND #2 AND #3 AND #4 AND #5
- 7 Title=(rat OR rats OR mice OR mouse OR dog OR dogs OR cats )
- 8 #6 NOT #7
- 
- **6 The Cochrane Library search strategy**
- The authors conducted an independent search in conjunction with our library search coordinator at the University of Connecticut. The database Web of Science was searched utilizing the following search strategy and search dates:
  - **The Cochrane Library**
  - Dates searched: 1898 to present
  - Results: 103 Central Register of Controlled Trials (CENTRAL)
  - 3 Database of Abstracts of Reviews of Effect (DARE)
  - Title, Abstract, Keywords= debrid\*
  - AND
  - Title, Abstract, Keywords= diabet\*
  - NOT
  - Record Title=(rat OR rats OR mice OR mouse OR dog OR dogs OR cats OR "cross-sectional study" OR “case report” OR comment OR editorial OR letter OR "case control" OR "case study" OR “case series” OR "follow-up study” OR “observational study” OR “prospective cohort” OR “cohort study” OR “longitudinal study” OR “retrospective study” OR “non-randomized”)
- **7 Cochrane Wounds Group Specialized Register (Searched 15/04/15)**
- Cochrane Wounds Group Specialized Register (Searched 15/04/15)
- The Cochrane Central Register of Controlled Trials (CENTRAL) - The Cochrane Library 2015, Issue 3
- Ovid MEDLINE & Ovid MEDLINE - In-Process & Other Non-Indexed Citations 2013 to April 14 2015
- Ovid EMBASE - 2013 to April 14 2015
- EBSCO CINAHL - 2013 to April 15 2015
- Cinahl Search Strategy
- S43 S30 and S42
- S42 S31 or S32 or S33 or S34 or S35 or S36 or S37 or S38 or S39 or S40 or S41
- S41 MH "Quantitative Studies"
- S40 TI placebo\* or AB placebo\*
- S39 MH "Placebos"
- S38 TI random\* allocat\* or AB random\* allocat\*

- S37 MH "Random Assignment"
- S36 TI randomi?ed control\* trial\* or AB randomi?ed control\* trial\*
- S35 AB ( singl\* or doubl\* or trebl\* or tripl\* ) and AB ( blind\* or mask\* )
- S34 TI ( singl\* or doubl\* or trebl\* or tripl\* ) and TI ( blind\* or mask\* )
- S33 TI clinic\* N1 trial\* or AB clinic\* N1 trial\*
- S32 PT Clinical trial
- S31 MH "Clinical Trials+"
- S30 S23 and S29
- S29 S24 or S25 or S26 or S27 or S28
- S28 TI diabet\* N3 wound\* or AB diabet\* N3 wound\*
- S27 TI (diabet\* N3 foot or diabet\* N3 feet) or AB (diabet\* N3 foot or diabet\* N3 feet)
- S26 TI diabet\* N3 ulcer\* or AB diabet\* N3 ulcer\*
- S25 (MH "Foot Ulcer+")
- S24 (MH "Diabetic Foot")
- S23 S1 or S2 or S3 or S4 or S5 or S6 or S7 or S8 or S9 or S10 or S11 or S12 or S13 or S14 or S15 or S16 or S17 or S18 or S19 or S20 or S21 or S22
- S22 TI zinc oxide or AB zinc oxide
- S21 (MH "Zinc Oxide")
- S20 TI ( hydrogel\* or intrasite gel or intrasitgel or sterigel or granugel or nugel or purilon or vigilon ) or AB ( hydrogel\* or intrasite gel or intrasitgel or sterigel or granugel or nugel or purilon or vigilon )
- S19 (MH "Hydrogel Dressings")
- S18 TI honey or AB honey
- S17 (MH "Honey")
- S16 TI wet-to-dry dressings or AB wet-to-dry dressings
- S15 TI ( dressing\* or gauze or adherent or absorbent or tulle or polysaccharide or alginate or foam or hydrofibre or hydrofiber or hydrocolloid\* or granuflex or tegasorb or aquacel or hydrocoll\* or combiderm or duoderm ) or AB ( dressing\* or gauze or adherent or absorbent or tulle or polysaccharide or alginate or foam or hydrofibre or hydrofiber or hydrocolloid\* or granuflex or tegasorb or aquacel or hydrocoll\* or combiderm or duoderm )
- S14 TI ( iodoflex or iodisorb ) or AB ( iodoflex or iodisorb )
- S13 TI ( polysaccharide bead\* or polysaccharide paste ) or AB ( polysaccharide bead\* or polysaccharide paste )
- S12 TI ( dextranomer\* or cadexomer or xerogel or eusol or debrisan ) or AB ( dextranomer\* or cadexomer or xerogel or eusol or debrisan )
- S11 TI dakin solution or AB dakin solution
- S10 TI ( malic acid or benzoid acid or salicylic acid or propylene glycol ) or AB ( malic acid or benzoid acid or salicylic acid or propylene glycol )
- S9 TI ( hypochlorite or hydrogen peroxide ) or AB ( hypochlorite or hydrogen peroxide )
- S8 TI whirlpool or AB whirlpool
- S7 TI ( wound irrigat\* or wound cleans\* ) or AB ( wound irrigat\* or wound cleans\* )
- S6 TI papain or AB papain
- S5 TI ( collagenase\* or fibrinolytic\* or proteolytic\* or trypsin or streptokinase or streptodornase or varidase ) or AB ( collagenase\* or fibrinolytic\* or proteolytic\* or trypsin or streptokinase or streptodornase or varidase )

- S4 TI ( larva\* or maggot\* or biosurgery or bio-surgery ) or AB ( larva\* or maggot\* or biosurgery or bio-surgery )
- S3 (MH "Larval Therapy")
- S2 TI ( debrid\* or slough\* or deslough\* ) or AB ( debrid\* or slough\* or deslough\* )
- S1 (MH "Debridement")
- Search Name: 42 Smith Debridement for DFU\_Issue 3 2015
- Date Run: 17/06/15 08:33:47.466
- Description: Re-ran searches over all issues (Issue 3 2015) [Revised SS Issue 2 2009]
- ID Search Hits
- #1 MeSH descriptor: [Debridement] explode all trees
- #2 (debrid\* or slough\* or deslough\*):ti,ab,kw
- #3 MeSH descriptor: [Larva] explode all trees
- #4 (larva\* or maggot\* or biosurgery or bio-surgery):ti,ab,kw
- #5 (wound\* next (irrigat\* or cleanse\*)):ti,ab,kw
- #6 whirlpool:ti,ab,kw
- #7 (collagenase\* or fibrinolytic\* or proteolytic\* or trypsin or streptokinase or streptodornase or varidase):ti,ab,kw
- #8 MeSH descriptor: [Papain] explode all trees
- #9 papain:ti,ab,kw
- #10 (hypochlorite or hydrogen peroxide):ti,ab,kw
- #11 (malic acid or benzoic acid or salicylic acid or propylene glycol):ti,ab,kw
- #12 "daklin solution":ti,ab,kw
- #13 (dextranomer\* or cadexomer or xerogel or eusol or debrisan):ti,ab,kw
- #14 (polysaccharide next (bead\* or paste\*)):ti,ab,kw
- #15 (iodoflex or iodisorb):ti,ab,kw
- #16 (((gauze or adherent or absorbent or tulle or polysaccharide or alginate or foam or hydrofibre or hydrofiber) next dressing\*) or saline gauze or hydrocolloid\* or granuflex or tegasorb or aquacel or hydrocoll\* or combiderm or duoderm):ti,ab,kw
- #17 "wet-to-dry dressings":ti,ab,kw
- #18 MeSH descriptor: [Honey] explode all trees
- #19 honey:ti,ab,kw 302
- #20 MeSH descriptor: [Hydrogel] explode all trees
- #21 (hydrogel\* or intrasite gel or intrasitgel or sterigel or granugel or nugel or purilon or vigilon):ti,ab,kw
- #22 MeSH descriptor: [Zinc Oxide] explode all trees
- #23 "zinc oxide":ti,ab,kw
- #24 #1 or #2 or #3 or #4 or #5 or #6 or #7 or #8 or #9 or #10 or #11 or #12 or #13 or #14 or #15 or #16 or #17 or #18 or #19 or #20 or #21 or #22 or #23
- #25 MeSH descriptor: [Foot Ulcer] explode all trees
- #26 MeSH descriptor: [Diabetic Foot] explode all trees
- #27 diabet\* near/3 ulcer\*:ti,ab,kw
- #28 diabet\* near/3 (foot or feet):ti,ab,kw
- #29 diabet\* near/3 wound\*:ti,ab,kw
- #30 #25 or #26 or #27 or #28 or #29
- #31 #24 and #30

- Database: Ovid MEDLINE(R) In-Process & Other Non-Indexed Citations and Ovid MEDLINE(R) <1946 to Present>
- Search Strategy:
  - -----
  - 1 exp Debridement/
  - 2 (debrid\$ or slough\$ or deslough\$).ti,ab.
  - 3 exp Larva/
  - 4 (larva\$ or maggot\$ or biosurgery or bio-surgery).ti,ab.
  - 5 (wound\$ adj (irrigat\$ or cleanse\$)).ti,ab.
  - 6 whirlpool.ti,ab.
  - 7 (collagenase\$ or fibrinolytic\$ or proteolytic\$ or trypsin or streptokinase or streptodornase or varidase).ti,ab.
  - 8 exp Papain/
  - 9 papain.ti,ab.
  - 10 (hypochlorite or hydrogen peroxide).ti,ab.
  - 11 (malic acid or benzoic acid or salicylic acid or propylene glycol).ti,ab.
  - 12 dakin solution.ti,ab.
  - 13 (dextranomer\$ or cadexomer or xerogel or eusol or debrisan).ti,ab.
  - 14 (polysaccharide adj (bead\$ or paste\$)).ti,ab.
  - 15 (iodoflex or iodisorb).ti,ab.
  - 16 (((gauze or adherent or absorbent or tulle or polysaccharide or alginate or foam or hydrofibre or hydrofiber) adj dressing\$) or saline gauze or hydrocolloid\$ or granuflex or tegasorb or aquacel or hydrocoll or combiderm or duoderm).ti,ab.
  - 17 "wet-to-dry dressings".ti,ab.
  - 18 exp Honey/
  - 19 honey\$.ti,ab.
  - 20 exp Hydrogel/
  - 21 (hydrogel\$ or intrasite gel or intrasitgel or sterigel or granugel or nugel or purilon or vigilon).ti,ab.
  - 22 exp Zinc Oxide/
  - 23 zinc oxide.ti,ab.
  - 24 or/1-23
  - 25 exp Foot Ulcer/
  - 26 exp Diabetic Foot/
  - 27 (diabet\$ adj3 ulcer\$).ti,ab.
  - 28 (diabet\$ adj3 (foot or feet)).ti,ab.
  - 29 (diabet\$ adj3 wound\$).ti,ab.
  - 30 or/25-29
  - 31 24 and 30
  - 32 randomized controlled trial.pt.
  - 33 controlled clinical trial.pt.
  - 34 randomized.ab.
  - 35 placebo.ab.
  - 36 clinical trials as topic.sh.
  - 37 randomly.ab.
  - 38 trial.ti.

- 39 or/32-38
- 40 (animals not (humans and animals)).sh.
- 41 39 not 40
- 42 31 and 41
- Database: Embase <1974 to 2015 June 16>
- Search Strategy:
  - -----
  - 1 exp Decubitus/
  - 2 (pressure adj (ulcer\$ or sore\$)).ti,ab.
  - 3 (decubitus adj (ulcer\$ or sore\$)).ti,ab.
  - 4 (bedsore\$ or (bed adj sore\$)).ti,ab.
  - 5 or/1-4
  - 6 exp Nutrition/
  - 7 nutrition\$.ti,ab.
  - 8 diet\$.ti,ab.
  - 9 (tube adj (fed or feed or feeding)).ti,ab.
  - 10 or/6-9
  - 11 5 and 10
  - 12 exp Clinical trial/
  - 13 Randomized controlled trial/
  - 14 Randomization/
  - 15 Single blind procedure/
  - 16 Double blind procedure/
  - 17 Crossover procedure/
  - 18 Placebo/
  - 19 Randomi?ed controlled trial\$.tw.
  - 20 RCT.tw.
  - 21 Random allocation.tw.
  - 22 Randomly allocated.tw.
  - 23 Allocated randomly.tw.
  - 24 (allocated adj2 random).tw.
  - 25 Single blind\$.tw.
  - 26 Double blind\$.tw.
  - 27 ((treble or triple) adj blind\$).tw.
  - 28 Placebo\$.tw.
  - 29 Prospective study/
  - 30 or/12-29
  - 31 Case study/
  - 32 Case report.tw.
  - 33 Abstract report/ or letter/
  - 34 or/31-33
  - 35 30 not 34
  - 36 animal/
  - 37 human/
  - 38 36 not 37
  - 39 35 not 38



- 40 11 and 39

1. Ovid MEDLINE. National Library of Medicine: Wolters Kluwer.
2. Elsevier. Embase: RELX Group.
3. Health E. CINAHL: EBSCO Industries.
4. Web of Science: Thomson Reuters.
